# Supplementary material
Source: Springer Nature journal article supplement (https://www.springermedizin.de/resource/supplementary/40001_2013_110_MOESM1_ESM.pdf/9685288)

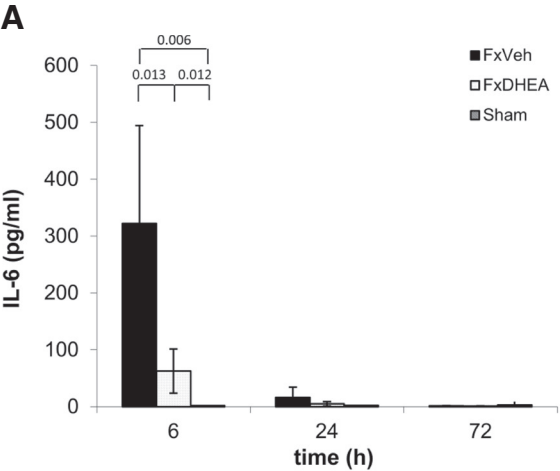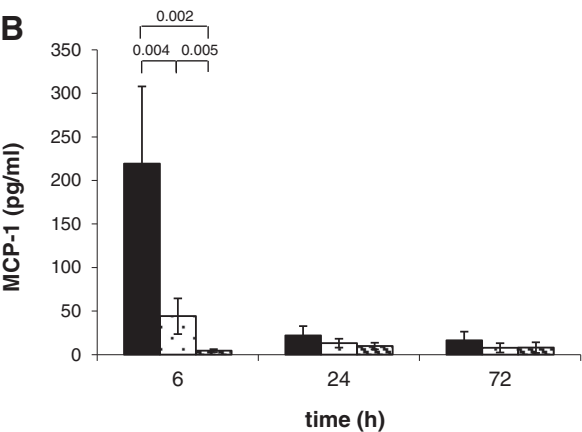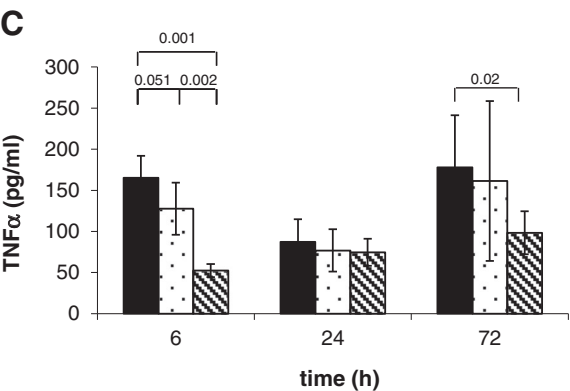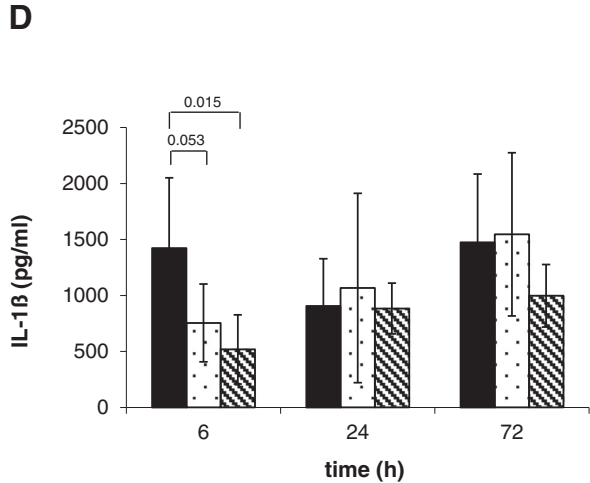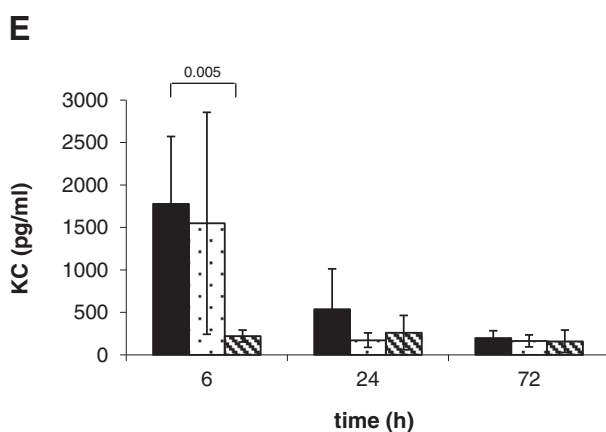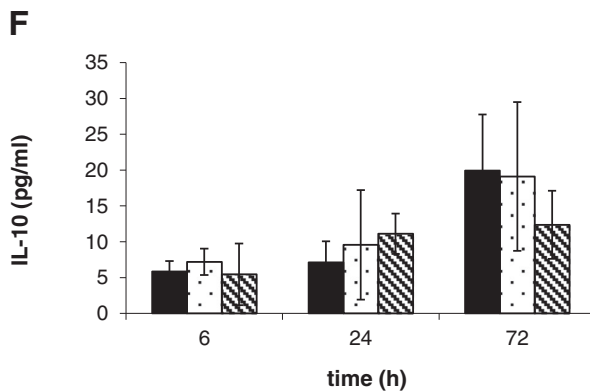

Supplement: MOESM1 [file 9685288]
